# Supplementary material for: Upregulated circRNA ARHGAP10 Predicts an Unfavorable Prognosis in NSCLC through Regulation of the miR-150-5p/GLUT-1 Axis
Source: PubMed Central journal article supplement — Mol Ther Nucleic Acids. 2019 Aug 21;18:219–31. doi: 10.1016/j.omtn.2019.08.016 (PMC6796700; doi:10.1016/j.omtn.2019.08.016), 2019-08-21
Supplement: mmc1.pdf [file mmc1.pdf]

OMTN, Volume 18

## **Supplemental Information**

**Upregulated circRNA ARHGAP10 Predicts  
an Unfavorable Prognosis in NSCLC through  
Regulation of the miR-150-5p/GLUT-1 Axis**

**Mingming Jin, Chunzi Shi, Chen Yang, Jianjun Liu, and Gang Huang**

## Supplementary materials 1

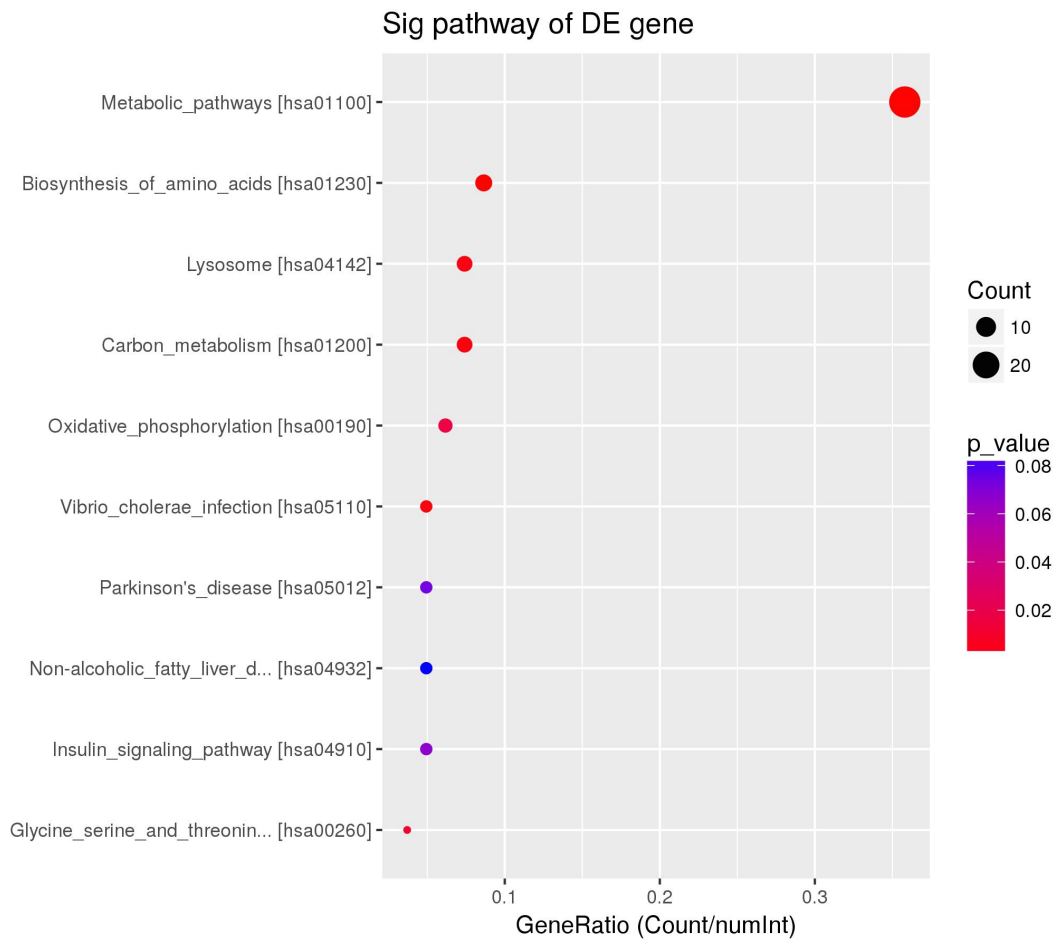

Figure legend: Metabolic pathway analysis.

Supplementary materials 2

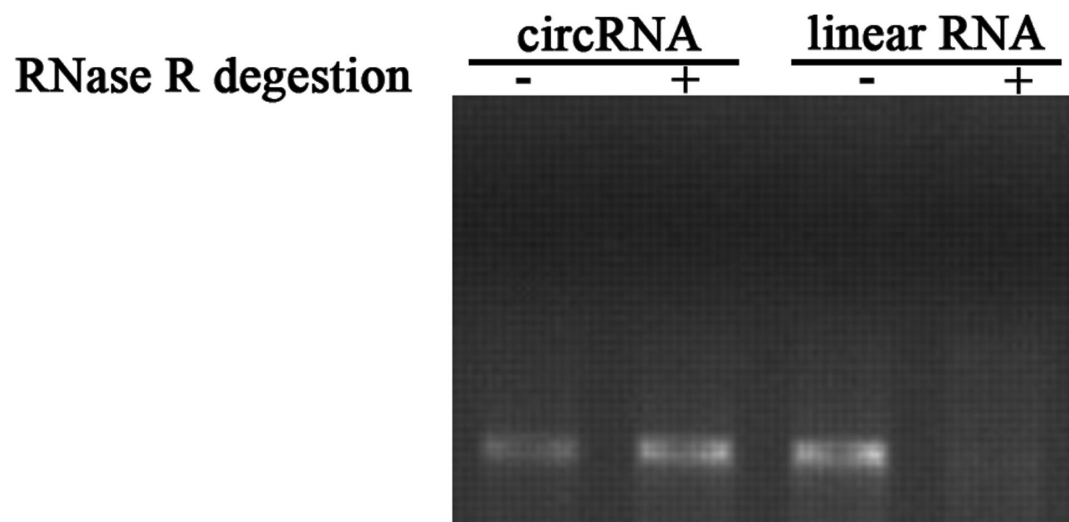

Figure legend: Agarose gel electrophoresis detection show the target segment of circARHGAP10 or linear RNA treatment with or without RNase R.
