# Supplementary material for: Upregulated circRNA ARHGAP10 Predicts an Unfavorable Prognosis in NSCLC through Regulation of the miR-150-5p/GLUT-1 Axis
Source: PubMed Central journal article supplement — Mol Ther Nucleic Acids. 2019 Aug 21;18:219–31. doi: 10.1016/j.omtn.2019.08.016 (PMC6796700; doi:10.1016/j.omtn.2019.08.016), 2019-08-21
Supplement: mmc2.pdf [file mmc2.pdf]

# Upregulated circRNA ARHGAP10 Predicts an Unfavorable Prognosis in NSCLC through Regulation of the miR-150-5p/GLUT-1 Axis

Mingming Jin,<sup>1,2</sup> Chunzi Shi,<sup>1,2</sup> Chen Yang,<sup>3</sup> Jianjun Liu,<sup>4</sup> and Gang Huang<sup>1,2,4</sup>

<sup>1</sup>Graduate School, Shanghai University of Traditional Chinese Medicine, Shanghai 201203, P.R. China; <sup>2</sup>Shanghai Key Laboratory of Molecular Imaging, Shanghai University of Medicine and Health Sciences, Shanghai 201318, P.R. China; <sup>3</sup>Department of Urology, Huashan Hospital, Fudan University, Shanghai 200040, China; <sup>4</sup>Department of Nuclear Medicine, Renji Hospital, School of Medicine, Shanghai Jiao Tong University, Shanghai 200127, China

**Non-small-cell lung cancer (NSCLC) is one of the deadliest cancers in the world. Circular RNA (circRNA) has been shown to participate in oncogenesis regulation, including lung cancer. Although the involvement of circRNAs in lung cancer has been reported, the regulatory mechanisms of circRNAs in NSCLC remain poorly understood. Thus, the present study aims at investigating the role of circARHGAP10 in NSCLC progression, which has been observed to be significantly upregulated in both NSCLC tissues and cell lines with profile analysis. A higher expression of circARHGAP10 also leads to a poor prognosis in NSCLC patients with fluorescence *in situ* hybridization (FISH). Both *in vitro* and *in vivo* experiments found that the downregulation of circARHGAP10 suppressed glycometabolism by decreasing GLUT1 expression. Silencing circARHGAP10 also suppressed proliferation and metastasis by targeting the miR-150-5p/GLUT1 axis in NSCLC, which was confirmed with a luciferase reporter assay. Overexpression of GLUT1 or downregulation miR-150-5p will recover NSCLC cell proliferation and metastasis after a knockdown of circARHGAP10. Taken together, these findings demonstrate that circARHGAP10 suppresses NSCLC progression by acting as a miR-150-5p sponge to promote GLUT1 expression. Thus, circARHGAP10 may be a potential target for NSCLC treatment.**

## INTRODUCTION

Lung cancer is the leading cause of cancer-associated mortality worldwide, of which more than 80% cases are non-small-cell lung cancer (NSCLC).<sup>1</sup> Despite the sustained breakthroughs in the clinical diagnosis and treatment of lung cancer, mortality rates continue to rise. Approximately 154,050 patients died from lung cancer in 2018, which represents 25.27% of all cancer-related mortality, and the overall 5-year survival rate of patients with lung cancer remains poor, at less than 20%.<sup>2,3</sup> Thus, investigation of the NSCLC-associated process is urgent for NSCLC diagnosis and treatment.

As primarily non-coding RNAs, including circular RNAs (circRNAs), play an important role in the regulation of oncogenesis. circRNAs are formed by backsplicing events that involve a downstream 3' splice

donor site joining an upstream 5' splice acceptor site in the primary transcript.<sup>4,5</sup> The circular covalently bonded structure means that they do not have a 5'-to-3' polarity or poly(A) tail, which endows them with a higher tolerance to exonucleases.<sup>6</sup> It has been found that many circRNAs originate from protein-coding genes. Due to their conservation, abundance, and specificity, circRNAs participate in a diverse number of physiological and pathological processes, including tumorigenesis.<sup>6</sup> Moreover, circRNAs are involved in gene regulation by serving as microRNA (miRNA) sponges.<sup>7</sup> Some circRNAs are derived from single or multiple exons and are detected in the cytoplasm, where they serve as miRNA sponges.<sup>7-10</sup> Recently, it has been reported that circABC10 expression in NSCLC cell lines is increased. Moreover, the downregulation of circABC10 suppressed NSCLC cell proliferation and migration by promoting miR-1252 expression and suppressing Forkhead box 2 (FOXR2).<sup>11</sup> In addition, F-circEA-2a, the circRNA derived from the EML4-ALK fusion gene, promotes cellular migration and invasion in NSCLC.<sup>12</sup> Although the involvement of some circRNAs has been reported in lung cancer, research into the biological function and regulatory mechanisms of circRNAs in lung cancer remains poorly understood. Therefore, the regulatory mechanisms of circRNAs in cancer must be extensively validated.

In the present study, we analyzed the expression profile of circRNAs in NSCLC and identified circARHGAP10 to be significantly increased in NSCLC tissues and closely related to the prognosis of NSCLC patients. In addition, we found that circARHGAP10 may function as a

Received 27 March 2019; accepted 13 August 2019;  
<https://doi.org/10.1016/j.omtn.2019.08.016>.

**Correspondence:** Gang Huang, MD, Shanghai Key Laboratory of Molecular Imaging, Shanghai University of Medicine and Health Sciences, 279 Zhouzhu Road, Pudong New Area, Shanghai 201318, P.R. China.

**E-mail:** [huanggang@sumhs.edu.cn](mailto:huanggang@sumhs.edu.cn)

**Correspondence:** Jianjun Liu, Department of Nuclear Medicine, Renji Hospital, School of Medicine, Shanghai Jiao Tong University, 160 Pujian Road, Shanghai 200127, China.

**E-mail:** [nuclearj@163.com](mailto:nuclearj@163.com)

**Correspondence:** Chen Yang, Department of Urology, Huashan Hospital, Fudan University, Shanghai, 200040, China.

**E-mail:** [zhyishya@sina.com](mailto:zhyishya@sina.com)

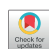

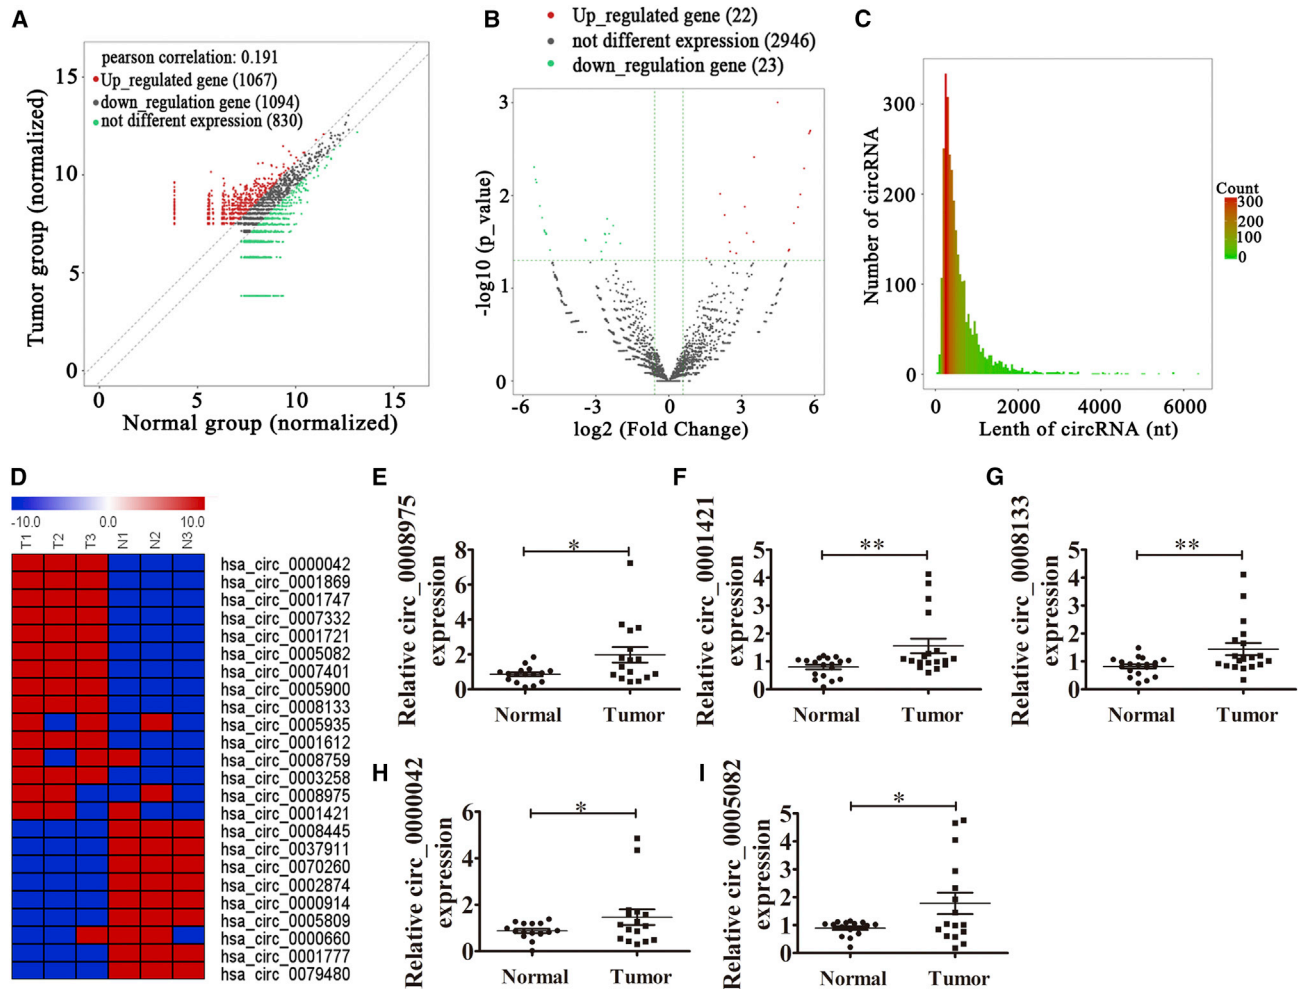

**Figure 1. The Differential Expression of circRNA in NSCLC**

(A) Scatterplots used to evaluate the differential expression of circRNAs between NSCLC tissues and the matched non-tumor tissues. (B) Volcano plots used to visualize the differential expression between two different groups; x axis,  $\log_2$  ratio of the level of circRNA expression between normal and tumor tissues; y axis, the false discovery rate value ( $-\log_{10}$  transformed) of the circRNAs. (C) Length distribution of the identified circRNAs; x axis, the length of the circRNAs detected in this study; y axis, the abundance of circRNAs classified by different lengths. (D) Heatmap of all the differentially expressed circRNAs between normal and tumor tissues. (E–I) Relative expressions of the five indicated circRNAs (hsa\_circ\_0008975, E; hsa\_circ\_0001421, F; hsa\_circ\_0008133, G; hsa\_circ\_0000042 (H); and hsa\_circ\_0005082, I) from 16 NSCLC tumor tissues and adjacent non-tumor tissues are listed as measured by qRT-PCR. The data are presented as the mean  $\pm$  SD. \* $p < 0.05$ ; \*\* $p < 0.01$ . N, non-tumor tissues; T, tumor tissues.

sponge of the antioncogene, miR-150-5p, to promote GLUT-1 expression and, consequently, promote NSCLC progression. Therefore, increased circARHGAP10 may serve as a biomarker for predicating prognosis as well as a potential therapeutic target for NSCLC patients.

## RESULTS

### Differential circRNA Expression Patterns in Human NSCLC and Adjacent Normal Tissues

To identify the relationship between abnormal circRNA expression and the progression of NSCLC, RNA sequencing (RNA-seq) analyses of rRNA-depleted total RNA were performed on six tissue samples (including three NSCLC tissues and three adjacent normal

tissues). Scatterplots were used to evaluate the differential expression of circRNAs between NSCLC tissues and the matched non-tumor tissues. The results revealed that 1,067 circRNAs were upregulated and 1,094 circRNAs were downregulated (Figure 1A). Differentially expressed circRNAs between cancer tissues and para-carcinoma tissues were identified through volcano plot filtering. The results showed that only 22 circRNAs were upregulated and 23 circRNAs were downregulated (Figure 1B). In our study, the sequencing results revealed that the expression of 2,991 circRNAs did not significantly change between the normal and tumor tissues, and the majority of the identified circRNAs consisted of fewer than 1,500 nt (Figure 1C). The results also revealed that there were different circRNA expression patterns

between the tumor tissues and the matched non-tumor tissues (Figure 1D). Then, five circRNAs (hsa\_circ\_0008975, hsa\_circ\_0001421, hsa\_circ\_0008133, hsa\_circ\_0000042, and hsa\_circ\_0005082) with significantly upregulated expression were selected for quantitative real-time RT-PCR analysis using 16–23 NSCLC and adjacent normal tissues. The results show that the expression of all selected circRNAs from the upregulated groups (hsa\_circ\_0008975, hsa\_circ\_0001421, hsa\_circ\_0008133, hsa\_circ\_0000042, and hsa\_circ\_0005082) were increased in NSCLC when compared with the matched non-tumor tissues (increased 2.3, 1.9, 1.88, 1.67, and 2.0 times, respectively), which was consistent with the RNA-seq results (Figures 1E–1I).

### The High Expression of circARHGAP10 in NSCLC Is Correlated with a Poorer Prognosis

Among these specific candidates, hsa\_circ\_0008975, which was formed by circularization of the exon of the ARHGAP10 gene, attracted our attention. The qRT-PCR detection results showed that the expression of hsa\_circ\_0008975 was significantly increased in the NSCLC cell lines A549, PC9, H1299, H1975, and H1650 when compared with the normal lung epithelial cells (BEAS-2B cells) (Figure 2A). Cell-cycle analyses by flow cytometry performed on A549 cells showed that a knockdown of hsa\_circ\_0008975 caused a mild cell-cycle arrest in the G0/G1 phase by almost 8% (Figure 2B). This finding suggested that hsa\_circ\_0008975 plays a role in the progression of NSCLC. Moreover, hsa\_circ\_0008975 is derived from circularizing two exons of the ARHGAP10 gene, which was located at chr4:148800382-148803083. ARHGAP10 consists of 2,701 bp, and the spliced mature circRNA is 202 bp (Figure 2C); thus, hsa\_circ\_0008975 was termed circARHGAP10. In order to further identify whether circARHGAP10 was circRNA, agarose gel electrophoresis was used. The results show that the target segment of circARHGAP10 can be amplified regardless of RNase R treatment. However, linear RNA disappeared after treatment with RNase R (Figure S2). This suggested that circARHGAP10 was circRNA. We selected 92 pairs of human NSCLC and adjacent normal tissues for an ARHGAP10 fluorescence *in situ* hybridization (FISH) assay, which demonstrated that circARHGAP10 was predominately localized to the cytoplasm (Figure 2D). These results also show that the expression of circARHGAP10 was increased in human NSCLC tissues compared to the adjacent normal tissues. The samples were divided into relatively high (above the adjacent normal tissues; n = 50) and relatively low (below the adjacent normal tissues; n = 42) levels of expression. No relationship between circARHGAP10 expression and the clinical factors, including sex (male and female), patient age ( $\leq 60$  years and  $> 60$  years), lymph node metastasis (negative and positive), tumor node metastasis (TNM) stage (I/II or III/IV, high), or tumor size ( $\leq 3$  cm,  $> 3$  cm) was found in our study (Table 1). Furthermore, the Gehan-Breslow-Wilcoxon test survival curves showed that NSCLC patients with high circARHGAP10 expression in NSCLC exhibited poor overall survival (Figure 2E). These results suggest that the expression of circARHGAP10 plays an important role in the progression of NSCLC.

### Knockdown of circARHGAP10 Suppressed the Proliferation of NSCLC Cells

To identify the relationship between circARHGAP10 and the proliferation of NSCLC cells, A549 and H1650 cells were used. Detection with qRT-PCR found that the expression of circARHGAP10 was decreased significantly after transfection with small interfering RNA (siRNA) against circARHGAP10 (sicircARHGAP10) in both A549 and H1650 cells compared with the negative control (NC) group (Figure 3A). This suggests that sicircARHGAP10 cells can be used for further study. Cancer cells metabolically exert the Warburg effect, which is characterized by the preferential consumption of glucose for energy under aerobic conditions rather than mitochondrial oxidative phosphorylation.<sup>13</sup> After analyzing the RNA-seq results, we found that the abnormal expression of circRNA was relative to the specific metabolic pathway (Figure S1). In the present study, we found that the knockdown of circARHGAP10 significantly decreased glucose consumption (Figure 3B) and lactate production (Figure 3C) in both A549 and H1650 cells compared to the NC group. Moreover, qRT-PCR detection found that the expression of GLUT1 was significantly decreased in both A549 and H1650 cells after silencing circARHGAP10 (Figure 3D). Glucose provides the chief metabolic support for cancer cell survival and growth, which is primarily imported into cells by facilitated glucose transporters (GLUTs). The increase in glucose uptake along with tumor progression is due to an incremental increase in the expression of facilitative GLUTs (e.g., GLUT1).<sup>14</sup> These findings indicate that GLUT1 plays an important role in circARHGAP10-mediated progression of NSCLC.

The *in vitro* experiment with CCK8 (Figures 3E and 3F) and colony formation assays (Figures 3G and 3H) showed that circARHGAP10 silencing suppressed the proliferation of both A549 and H1650 cells. A circARHGAP10 knockdown stable lentiviral strain (small hairpin RNA expression vector, sh-circRNA) or sh-NC A549 cells were used for tumor formation. The xenograft results showed that circARHGAP10 knockdown suppressed tumor growth in both volume and weight compared with the NC group (Figures 3I–3K). Immunohistochemical detection with Ki67 staining revealed that circARHGAP10 silencing suppressed the expression of Ki67 in tumor tissues (Figure 3L), which suggested that the circARHGAP10 knockdown suppressed tumor growth. Immunofluorescence with GLUT1 staining revealed that circARHGAP10 silencing inhibited GLUT1 expression compared with the NC group (Figure 3M).

### Knockdown of circARHGAP10 Suppressed NSCLC Metastasis

To characterize the role of circARHGAP10 in the metastasis of NSCLC, A549 and H1650 cells were used for wound-healing assays and Transwell analysis. The results of the wound-healing assay showed that silencing circARHGAP10 suppressed the closure of scratch wounds (Figures 4A and 4B), suggesting that circARHGAP10 plays an important role in promoting NSCLC cell invasion. The Transwell assays also showed that circARHGAP10 silencing inhibited NSCLC cell migration (Figures 4C and 4D). An increasing number of studies have verified that the epithelial-to-mesenchymal transition (EMT) contributes to the invasion and metastasis of epithelial tumors.<sup>15</sup> In the present study,

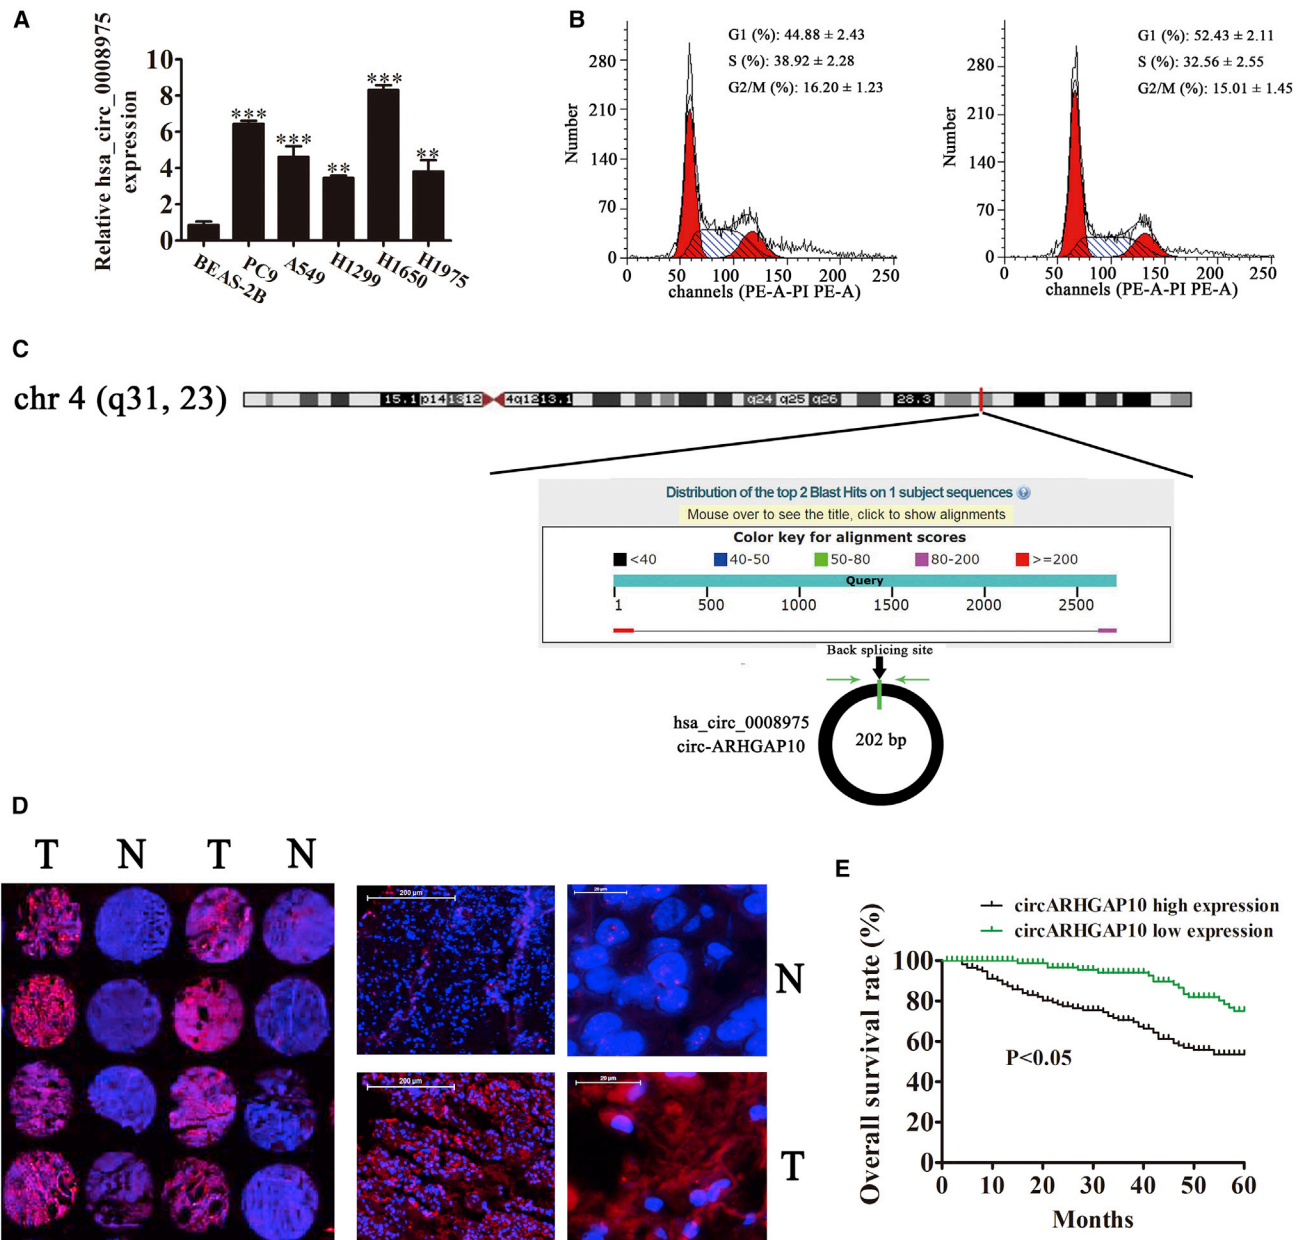

**Figure 2. Expression of circARHGAP10 in NSCLC Correlates with Patient Prognosis**

(A) RT-PCR detection of circPIP5K1A expression in A549, PC9, H1299, H1975, H1650, and the normal lung epithelial cells, BEAS-2B. Data are presented as the mean  $\pm$  SD. \*\*\* $p < 0.001$  versus the normal group. (B) Representative results showing the percentage of cells in G1, S, or G2 phase in A549 cells by flow cytometry. (C) The genomic loci of the *ARHGAP10* gene and circARHGAP10. The red arrow indicates back-splicing. (D) The expression of circARHGAP10 in NSCLC was analyzed using *in situ* hybridization on an NSCLC tissue chip (92 cases). (E) The prognostic significance of circMTO1 expression for NSCLC patients was determined with FISH values, using the median value as the cutoff. The observation time was 60 months. N, non-tumor tissues; T, tumor tissues.

we also found that the knockdown of circARHGAP10 promoted the expression of E-cadherin (Figure 4E) in parallel with a reduction in N-cadherin (Figure 4F) and Snail (Figure 4G) expression. These findings suggest that the downregulation of circARHGAP10 suppressed NSCLC metastasis and EMT. The  $^{18}\text{F}$ -deoxyglucose ( $^{18}\text{F}$ -FDG) positron emission tomography (PET)/computed tomography (CT) images

show that circARHGAP10 silencing resulted in a lower standard uptake values (SUVmax) than the NC group in the xenografts of nude mice (Figure 4H). Previous studies found that high  $^{18}\text{F}$ -FDG uptake indicated a poor prognosis.<sup>16,17</sup> This suggested that the knockdown of circARHGAP10 suppressed the metastasis of NSCLC, which was relative to glycometabolism regulation.

**Table 1. The Clinical-Pathological Factors of 92 NSCLC Patients**

| Characteristic               | Numbers | Expression of circRNA ARHGAP10 |               |
|------------------------------|---------|--------------------------------|---------------|
|                              |         | Low (n = 42)                   | High (n = 50) |
| <b>Sex</b>                   |         |                                |               |
| Male                         | 50      | 20                             | 30            |
| Female                       | 42      | 22                             | 20            |
| <b>Age</b>                   |         |                                |               |
| ≤60                          | 39      | 21                             | 18            |
| >60                          | 53      | 21                             | 32            |
| <b>TNM Stages</b>            |         |                                |               |
| I and II                     | 57      | 29                             | 28            |
| III and IV                   | 35      | 13                             | 22            |
| <b>Lymph Node Metastasis</b> |         |                                |               |
| Negative                     | 56      | 28                             | 28            |
| Positive                     | 36      | 14                             | 22            |
| <b>Tumor Size</b>            |         |                                |               |
| ≤3 cm                        | 48      | 24                             | 24            |
| >3 cm                        | 44      | 18                             | 26            |

All p values were not statistically different.

### Both GLUT1 and miR-150-5p Are the Targets of circARHGAP10

To characterize the precise role of circARHGAP10 in the progression of NSCLC, a bioinformatics analysis was used to predict miR-150-5p as the downstream target of circARHGAP10. To further identify whether miR-150-5p was a possible target of circARHGAP10, a wild-type or mutated sequence containing the miR-150-5p binding sequence was used to construct a luciferase reporter vector (Figure 5A). The luciferase reporter vector was transfected into 293T cells combined with or without the miR-150-5p mimic. A luciferase reporter analysis found that miR-150-5p inhibited the luciferase activity in wild-type cells but not in mutated cell lines (Figure 5B). This suggested that miR-150-5p was the target of circARHGAP10.

qRT-PCR detection showed that the circARHGAP10 knockdown suppressed circARHGAP10 expression in both A549 and H1650 cells (Figures 5C and 5D). Treatment with the miR-150-5p inhibitor or GLUT1 overexpression had no effect on the expression of circARHGAP10 (Figures 5C and 5D). qRT-PCR detection also found that circARHGAP10 silencing promoted miR-150-5p expression, suggesting that circARHGAP10 acts as a sponge in regulating the function of miR-150-5p. Treatment with the miR-150-5p inhibitor significantly suppressed miR-150-5p expression, even when circARHGAP10 was knocked down. However, the overexpression of GLUT1 had no influence on miR-150-5p expression (Figures 5E and 5F), indicating that GLUT1 was located downstream of miR-150-5p. Subsequent experiments confirmed that treatment with the miR-150-5p inhibitor rescued GLUT1 expression after a circARHGAP10 knockdown in both A549 and H1650 cells. GLUT1 expression was significantly increased following transfection with

a GLUT1 overexpression vector in both A549 and H1650 cells (Figures 5G and 5H).

*In vitro* experiments involving CCK8 (Figures 5I and 5J) and a colony formation assay (Figures 5K and 5L) showed that treatment with an miR-150-5p inhibitor rescued the cell activity and proliferation after a knockdown of circARHGAP10 in both A549 and H1650 cells. In turn, GLUT1 overexpression increased the level of cellular activity and proliferation after a circARHGAP10 knockdown in both A549 and H1650 cells. A Transwell assay also showed that treatment with the miR-150-5p inhibitor reversed the effect of the circARHGAP10 knockdown and inhibited the migration of both A549 and H1650 cells. GLUT1 overexpression increased the level of cellular migration in both A549 and H1650 cells (Figures 5M and 5N). A wound-healing assay found that treatment with an miR-150-5p inhibitor reversed the circARHGAP10 knockdown-induced difficulty of scratch-wound closure (Figures 4A and 4B). GLUT1 overexpression promoted the closure of scratch wounds following circARHGAP10 silencing. These findings indicate that circARHGAP10 silencing suppressed NSCLC proliferation and metastasis by inhibiting GLUT1 and promoting miR-150-5p expression.

### GLUT1 Overexpression Reversed the Inhibitory Effect of miR-150-5p on Cellular Proliferation and Metastasis *In Vitro*

To further confirm the relationship between GLUT1 and miR-150-5p, wild-type or mutated GLUT1 3' UTR sequences containing the miR-150-5p binding sequence were constructed into a luciferase reporter vector (Figure 6A). The luciferase reporter vector was then transfected into 293T cells combined with or without a miR-150-5p mimic. A luciferase reporter analysis found that miR-150-5p inhibited luciferase activity in wild-type cells, but not in mutated cell lines (Figure 6B), suggesting that GLUT1 was the target of miR-150-5p. In addition, miR-150-5p can suppress post-transcriptional GLUT1 expression by interacting with the 3' UTR of GLUT1 at the mRNA level. Moreover, qRT-PCR detection revealed that miR-150-5p overexpression (transfection with a miR-150-5p mimic) significantly suppressed GLUT1 expression. However, GLUT1 overexpression had no significant influence on miR-150-5p expression (Figures 6C–6F).

The *in vitro* experiments involving CCK8 (Figures 6G and 6H) and colony formation assays (Figures 6I and 6J) showed that miR-150-5p overexpression inhibited cellular activity and proliferation in both A549 and H1650 cells. GLUT1 overexpression rescued the cellular activity and proliferation following miR-150-5p overexpression in both A549 and H1650 cells. Wound-healing assays found that miR-150-5p overexpression inhibited the closure of scratch wounds, whereas GLUT1 overexpression promoted the closure of scratch wounds following miR-150-5p overexpression (Figures 6K–6M). The Transwell assays also showed that GLUT1 overexpression reversed miR-150-5p overexpression and induced the inhibition of both A549 and H1650 cell migration (Figures 6N–6P). These findings suggest that the overexpression of GLUT1 reversed the

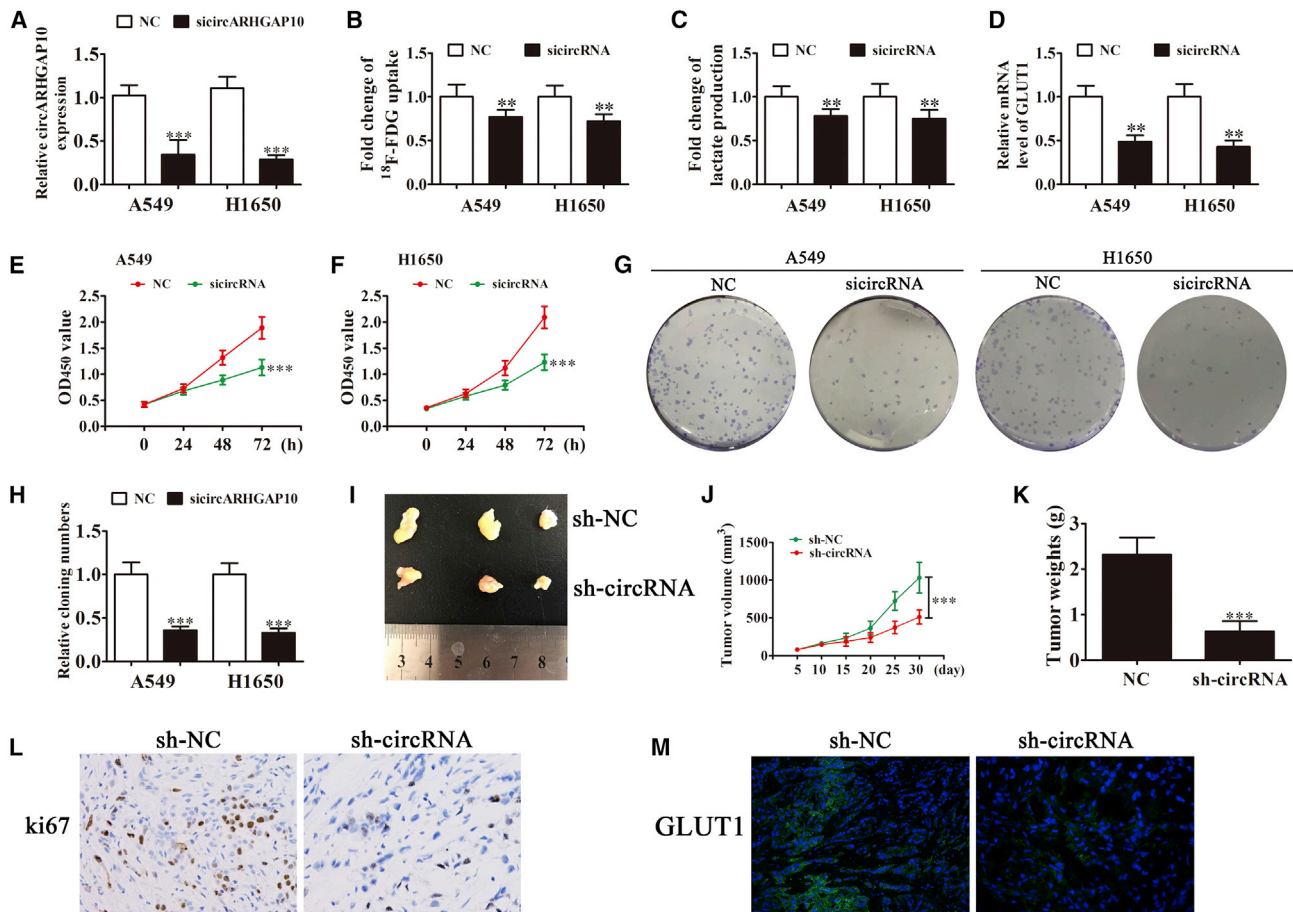

**Figure 3. Knockdown of circARHGAP10 Suppresses the Proliferation of NSCLC Cells by Downregulating GLUT1**

(A) qRT-PCR detection of circARHGAP10 expression following transfection with siRNA against circARHGAP10 (si/circARHGAP10) or the negative control (NC). Data are presented as the mean  $\pm$  SD. \*\*\* $p$  < 0.001 versus NC. (B and C) Both  $^{18}\text{F}$ -FDG uptake (B) and lactate production (C) were decreased in the cells after silencing circARHGAP10. (D) qRT-PCR detection results revealed that GLUT1 expression was significantly downregulated after circARHGAP10 silencing in both A549 and H1650 cells. (E and F) CCK8 assays were used to evaluate cellular proliferation in both (E) A549 and (F) H1650 cells. Data are presented as the mean  $\pm$  SD. \*\*\* $p$  < 0.001 versus NC. (G and H) Cloning formation assay showing the level of cellular proliferation in both A549 and H1650 cells (G). The relative cloning number was calculated (H). Data are presented as the mean  $\pm$  SD. \*\*\* $p$  < 0.001 versus NC. (I) Representative photographs of A549 tumor formation in the xenografts of nude mice. (J) Summary of the tumor volume in mice that were measured weekly. Data are presented as the mean  $\pm$  SD. \*\*\* $p$  < 0.001 versus NC. (K) Tumor weight was measured 30 days post-injection. Data are presented as the mean  $\pm$  SD. \*\*\* $p$  < 0.001 versus NC. (L) Immunohistochemical analysis shows the percentage of Ki-67-positive cells in the xenograft tumor tissues. (M) Immunohistochemical analysis shows the expression of GLUT1 in the tumor tissues.

inhibitory effect of miR-150-5p on cellular proliferation and metastasis *in vitro*.

## DISCUSSION

The role of circRNAs in carcinogenesis and cancer progression has attracted recent attention; however, the role and function of circRNAs in NSCLC remain unclear. Therefore, in the present study, we screened the differentially expressed circRNAs between human NSCLC and adjacent normal tissues using RNA-seq. The data show that the expression of circARHGAP10 was significantly increased in both NSCLC tissues and cell lines. Moreover, the high level of circARHGAP10 expression is correlated with a poorer prognosis. circRNAs are recognized as functional non-coding RNAs involved

in human cancers.<sup>18,19</sup> Several studies have found that the circRNA hsa\_circ\_0008305 (circPTK2) inhibits transforming growth factor  $\beta$  (TGF- $\beta$ )-induced EMT and metastasis by controlling transcription intermediary factor 1-gamma (TIF1 $\gamma$ ) in NSCLC.<sup>20</sup> The circRNA F-circEA-2a derived from the EML4-ALK fusion gene promotes cellular migration and invasion in NSCLC.<sup>12</sup> In the present study, we found that the expression of circARHGAP10 was relative to glucose metabolism regulation. The downregulation of circARHGAP10 suppressed glucose consumption and lactate production by downregulating GLUT1. We know that a high  $^{18}\text{F}$ -FDG uptake is predictive of a worse outcome in NSCLC patients.<sup>21</sup> The metabolic state of a cell is influenced by extrinsic cellular factors, including nutrient availability and growth factor signaling. Increasing evidence indicates

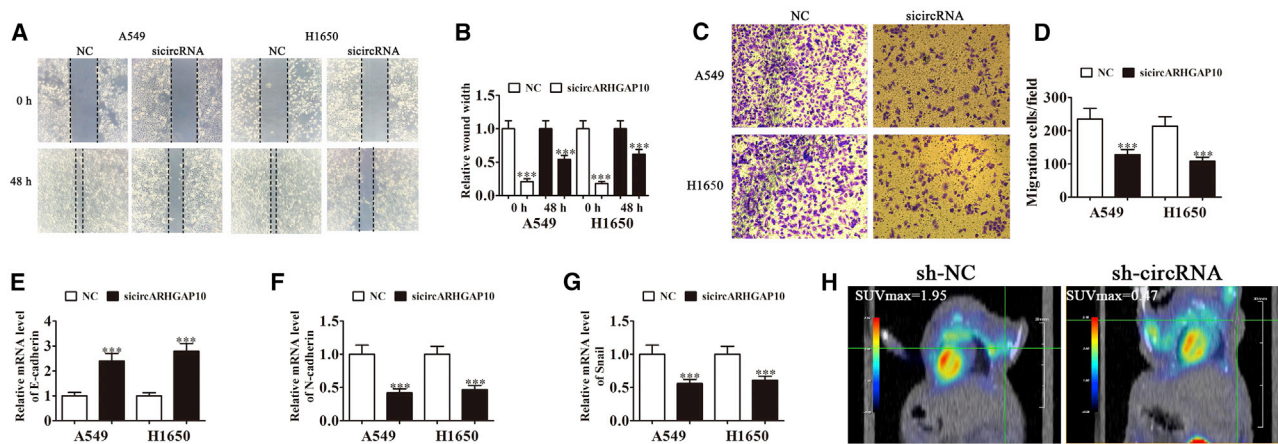

**Figure 4. Knockdown of circARHGAP10 Suppresses NSCLC Metastasis**

(A and B) Wound-healing assays showing the effect of circARHGAP10 on the closure of scratch wounds. Data are presented as the mean  $\pm$  SD. \*\*\* $p$  < 0.001 versus NC. (C and D) Cellular migration was assessed in both A549 and H1650 cells (C) using Transwell assays. The relative migration cells were calculated (D). Data are presented as the mean  $\pm$  SD. \*\*\* $p$  < 0.001 versus NC. (E–G) qRT-PCR detection shows the relative expression of EMT proteins (E) E-cadherin, (F) N-cadherin, and (G) Snail. Data are presented as the mean  $\pm$  SD. \*\*\* $p$  < 0.001 versus NC. (H) PET images showing the effects of circARHGAP10 on the metastasis of A549 cells 30 days following intravenous tail injection.

that the downregulation of GLUT1 will suppress the growth of different tumors, including breast cancer,<sup>22</sup> ovarian cancer,<sup>23</sup> liver cancer,<sup>24</sup> and NSCLC.<sup>25</sup> However, the regulatory mechanism by which circARHGAP10 interacts with GLUT1 to mediate the progression of NSCLC remains unclear.

In the present study, we also found that the downregulation of circARHGAP10 suppressed NSCLC proliferation and metastasis in both *in vivo* and *in vitro* experiments. A bioinformatics analysis found that miR-150-5p was the target of circARHGAP10, which was confirmed by a luciferase reporter assay. Moreover, miR-150-5p has been implicated in tumor initiation and progression in a variety of cancers. A study of colorectal cancer found that miR-150-5p suppresses tumor progression by targeting VEGFA.<sup>26</sup> Another study found that miR-150-5p affects cellular proliferation, apoptosis, and EMT by regulating BRAFV600E mutations in papillary thyroid cancer cells.<sup>27</sup> The expression of miR-150-5p has also been found to suppress the progression of prostate cancer<sup>28</sup> and neck squamous cell carcinoma.<sup>29</sup> In this study, we found that the downregulation of circARHGAP10 promoted miR-150-5p expression. In addition, the downregulation of miR-150-5p reversed the inhibitory effect of circARHGAP10 silencing on NSCLC cell proliferation and metastasis. This suggests that circARHGAP10 silencing can suppress NSCLC proliferation and metastasis by absorbing miR-150-5p, which was consistent with findings from previous studies that demonstrated that circRNA functions as a sponge for miRNA.<sup>30</sup>

The bioinformatics analysis found that GLUT1 was the target of miR-150-5p, which was confirmed with a luciferase reporter assay. The *in vitro* study found that miR-150-5p overexpression suppressed NSCLC cell proliferation and metastasis. GLUT1 overexpression

rescued NSCLC cell proliferation and metastasis following miR-150-5p upregulation, because heterologous GLUT1 has no 3' UTR. Therefore, miR-150-5p cannot interact with the 3' UTR of GLUT1 and silence it at the mRNA level.

## Conclusions

In summary, our study first revealed that circARHGAP10 is increased in both NSCLC patient and cell lines, and this upregulation may be associated with aggressive NSCLC phenotypes. Additionally, circARHGAP10 silencing suppressed NSCLC proliferation and metastasis in both *in vitro* and *in vivo* experiments. We also found that the downregulation of circARHGAP10 suppressed the proliferation and migration in NSCLC by targeting the miR-150-5p/GLUT1 axis. In conclusion, we identified circARHGAP10 as a promising therapeutic target in NSCLC; therefore, further investigation of the circARHGAP10/miR-150-5p/GLUT1 axis may provide a foundation for developing novel potential therapeutic strategies for NSCLC.

## MATERIALS AND METHODS

### Tissue Samples

A total of 92 fresh NSCLC tissues and paired adjacent noncancerous lung tissues were collected after obtaining informed consent from patients at Renji Hospital of Shanghai Jiaotong University, Shanghai, China. Histological and pathological diagnostics for NSCLC patients were evaluated based on the Revised International System for Staging Lung Cancer. Patients received neither chemotherapy nor radiotherapy before tissue sampling (Table 1). The samples were snap-frozen in liquid nitrogen and stored at  $-80^{\circ}\text{C}$  prior to RNA extraction. This study was approved by the Ethics Committee of Renji Hospital of Shanghai Jiaotong University.

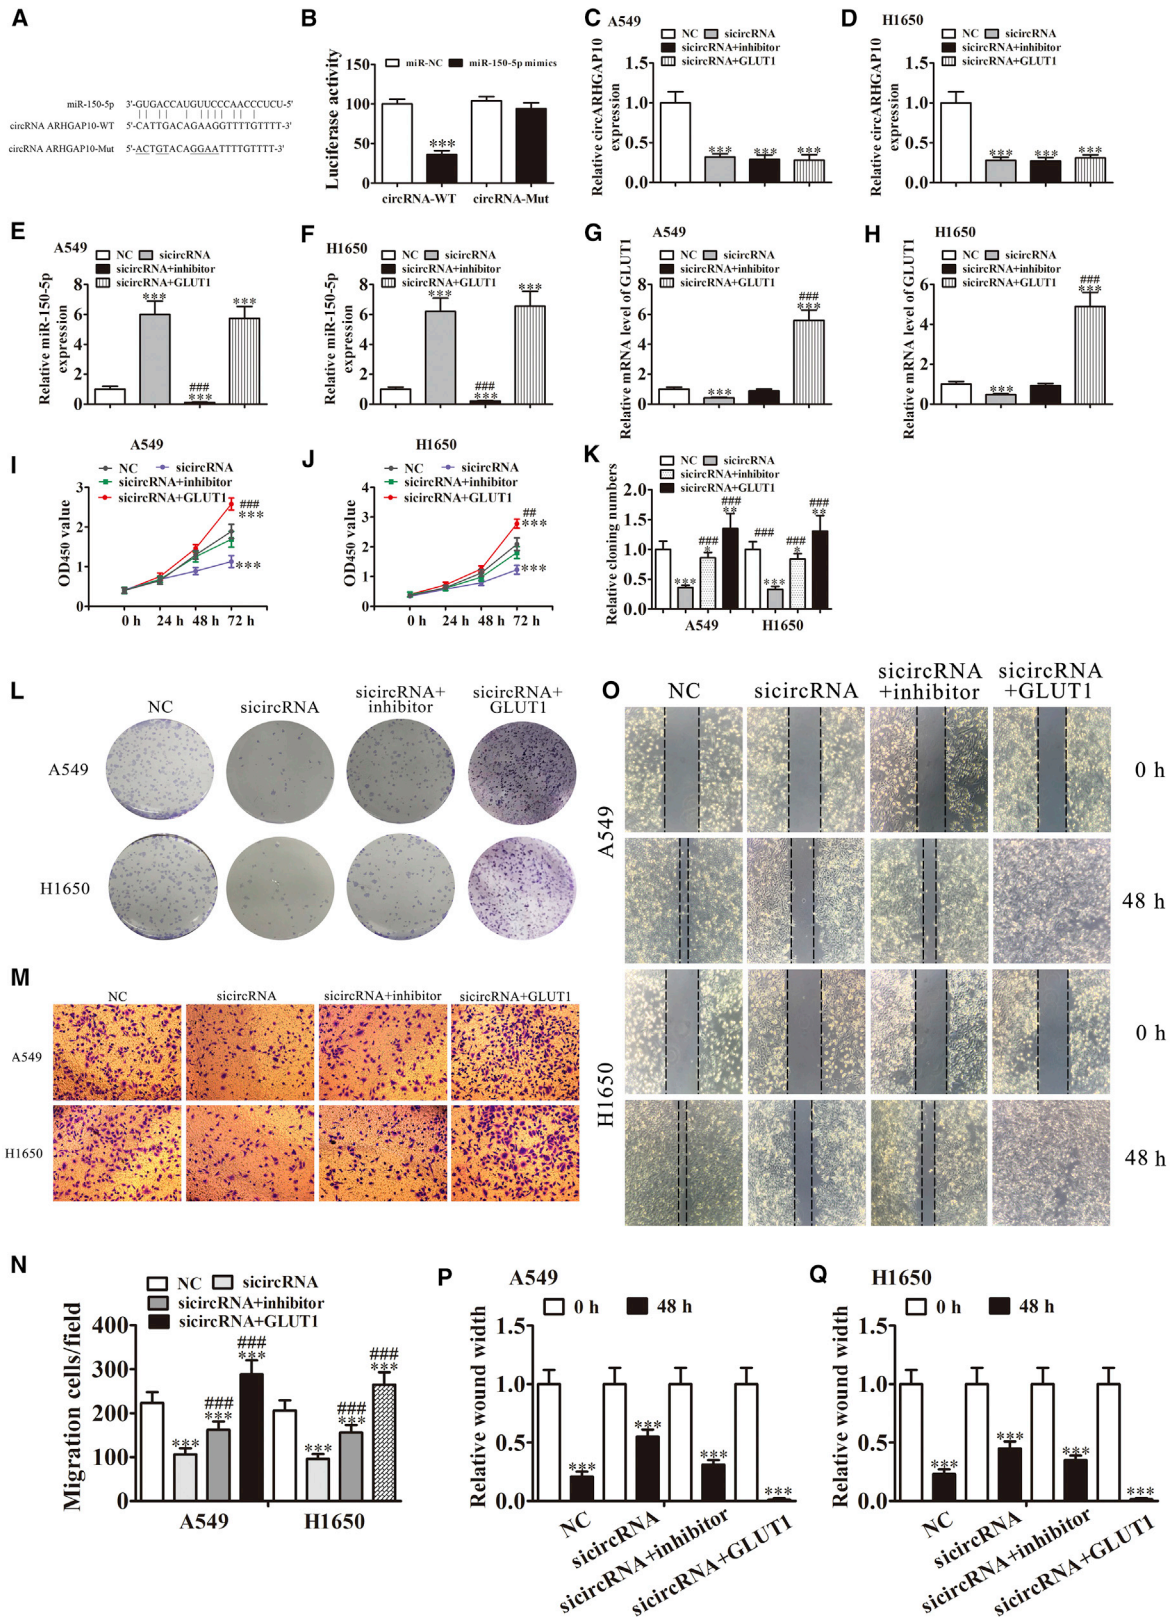

(legend on next page)



### Strand-Specific RNA-Seq Library Construction and High-Throughput RNA-Seq

Total RNA was extracted from three paired NSCLC tissues and paired adjacent noncancerous lung tissues using TRIzol Reagent (Invitrogen, Carlsbad, CA, USA). Approximately 3  $\mu$ g total RNA from each sample was subjected to the VAHTS Total RNA-seq (H/M/R) Library Prep Kit for Illumina (Vazyme Biotech, Nanjing, China) to remove rRNA while retaining other types of RNA, including mRNA and non-coding RNA (ncRNA). Purified RNA was treated with RNase R (Epicenter, 40 U, 37°C for 3 h), followed by purification with TRIzol. RNA-seq libraries were prepared using the KAPA Stranded RNA-Seq Library Prep Kit (Roche, Basel, Switzerland) and subjected to deep sequencing with an Illumina HiSeq 4000 (Aksomics, H1712024, Shanghai, China).

### Cell Lines and Cell Culture

Human lung normal epithelial BEAS-2B cells; NSCLC A549, H1299, PC9, H1975 cells; and H1650 cell lines from the Cell Bank of Chinese Academy of Sciences were cultured in DMEM (Life Technologies, Carlsbad, CA, USA) supplemented with 100 IU/mL penicillin, 100  $\mu$ g/mL streptomycin, and 10% fetal bovine serum (FBS; Invitrogen, Carlsbad, CA, USA) at 37°C in a humidified atmosphere with 5% CO<sub>2</sub>.

### FISH

Specific probes to *hsa\_circ\_0008975* (circARHGAP10) (Dig-5'-AAACGGAGCAGGCCGATCAGCAGCTTC-3'-Dig) and biotin-labeled probes against miR-155-5p (Bio-5'-CACTCCTACAA GGGTTGGGAGA-3'-Bio) were prepared (Genesee Biotech, Guangzhou, China). The signals were detected by Cy3-conjugated anti-digoxin and fluorescein isothiocyanate (FITC)-conjugated anti-biotin antibodies (Jackson ImmunoResearch Laboratories, West Grove, PA, USA). Cell nuclei were counterstained with DAPI. Finally, images were obtained on a Zeiss LSM 700 confocal microscope (Carl Zeiss, Oberkochen, Germany).

### Bioinformatics Analysis

The circRNA/miRNA target gene was predicted using the Circular RNA Interactome website at <https://circinteractome.nia.nih.gov/>. The interactive relationship between miR-155-5p and GLUT-1 was predicted using the TargetScan website at <http://www.targetscan.org/>.

The relationship between ARHGAP10 and the prognoses in NSCLC patients was predicted using the GEPIA (Gene Expression Profiling Interactive Analysis) website at <http://gepia.cancer-pku.cn/>.

### Total RNA Isolation and qRT-PCR

Total RNA was isolated from the tumor tissues or cells using TRIzol Reagent (Invitrogen, Carlsbad, CA, USA) following the manufacturer's protocol. The purity and concentration of the RNA samples were examined spectrophotometrically by measuring the absorbance at 260 nm, 280 nm, and 230 nm using the NanoDrop ND-1000 (Thermo Fisher Scientific, Wilmington, DE, USA). Specifically, optical density (OD)<sub>260</sub>/OD<sub>280</sub> ratios between 1.8 and 2.1 were deemed acceptable, and OD<sub>260</sub>/OD<sub>230</sub> ratios greater than 1.8 were deemed acceptable.

RNA (1  $\mu$ g) was reverse transcribed into cDNA using SuperScript II Reverse Transcriptase (Invitrogen, Thermo Fisher Scientific). Then qRT-PCR was performed using an AB7300 thermo-recycler (Applied Biosystems, Carlsbad, CA, USA) with primers (primers specific for circRNA, miR-150-5p, and GLUT1 were obtained from GenePharma, Shanghai, China) and the TaqMan Universal PCR Master Mix. *GAPDH* was used as the reference gene for circRNA and mRNA. U6 was used as an internal control for the level of miRNA expression. Gene expression was quantified using the 2<sup>- $\Delta\Delta$ Ct</sup> method as previously described.<sup>31</sup> The primers used to assay *hsa\_circ\_0008975* expression were: forward, 5'-TCTTTTGAAGA ATGTACCAAGAG-3'; and reverse, 5'-GGGATCATGTTGA ACTTCTTTG-3'. The *hsa\_circ\_0001421* primers were: forward, 5'-TCTCTGGAGTTCTGATTGCAGGTGG-3'; and reverse, 5'-TG CTAGGTAAATGGGGTGATTCTGG-3'. The *hsa\_circ\_0008133* primers were: forward, 5'-AATGGTCCAACAGACAGTTATG CAG-3'; and reverse, 5'-ATTACTCCATCAACAGCATCAAGGG -3'. The *hsa\_circ\_0000042* primers were: forward, 5'-AGGATC CAAATTCGATACAGTGGC-3'; and reverse, 5'-ATTTCTTA GCTGCTCGGTAAGTGGG-3'. The *hsa\_circ\_0005082* primers were: forward, 5'-CACCGCAAACCTGCAGCCGGAGAG-3'; and reverse, 5'-GGTCCAGTGGCTTCTGGGGTGAGGC-3'. The *miR-150-5p* primers were: forward, 5'-ACACTCCAGCTGGGTCTC CCAACCCCTTGTA-3'; and reverse, 5'-CTCAACTGGTGTCTG GGAGTCGGCAATTCAGTTGAGCACTGGTA-3'. The *GLUT1* primers were: forward, 5'-TTATTGCCAGGTGTTCGGC-3'; and

### Figure 5. Both GLUT1 and miR-150-5p Are circARHGAP10 Targets

(A) A Bioedit software comparison showing the predicted binding sites, and the mutated (Mut) version of circARHGAP10 is also shown. (B) The relative luciferase activity was determined 48 h after transfection with the miR-150-5p mimic/normal control (NC) or with the circARHGAP10 wild- or Mut-type in 293T cells. Data are presented as the mean  $\pm$  SD. \*\*\*p < 0.001. (C–F) qRT-PCR detection showing the level of circARHGAP10 (A549, C; H1650, D), miR-150-5p (A549, E; H1650, F), and GLUT1 (A549, G; H1650, H) expression. Data are presented as the mean  $\pm$  SD. \*\*\*p < 0.001 versus NC. ###p < 0.001 versus sicircARHGAP10. (I and J) CCK8 assay showing that the downregulation of miR-150-5p or overexpression GLUT1 rescued the proliferation of both (I) A549 and (J) H1650 cells after silencing circARHGAP10. Data are presented as the mean  $\pm$  SD. \*\*\*p < 0.001 versus NC. ##p < 0.01; ###p < 0.001 versus sicircARHGAP10. (K and L) Cloning formation assays show that the downregulation of miR-150-5p or overexpression of GLUT1 rescued the proliferation of both A549 and H1650 cells after circARHGAP10 silencing (L). The relative cloning numbers were calculated (K). Data are presented as the mean  $\pm$  SD. \*p < 0.05; \*\*p < 0.01; \*\*\*p < 0.001 versus NC. ###p < 0.001 versus sicircARHGAP10. (M and N) A Transwell assay showing that the downregulation of miR-150-5p rescued the cellular migration of both A549 and H1650 cells after circARHGAP10 silencing (M). The relative migration cells were calculated (N). Data are presented as the mean  $\pm$  SD. \*\*\*p < 0.001 versus NC. ###p < 0.001 versus sicircARHGAP10. (O–Q) Wound-healing assays show that the downregulation of miR-150-5p or overexpression of GLUT1 rescued the cellular invasion of both A549 (O and P) and H1650 (O and Q) cells following circARHGAP10 silencing. Data are presented as the mean  $\pm$  SD. \*\*\*p < 0.001 versus NC.

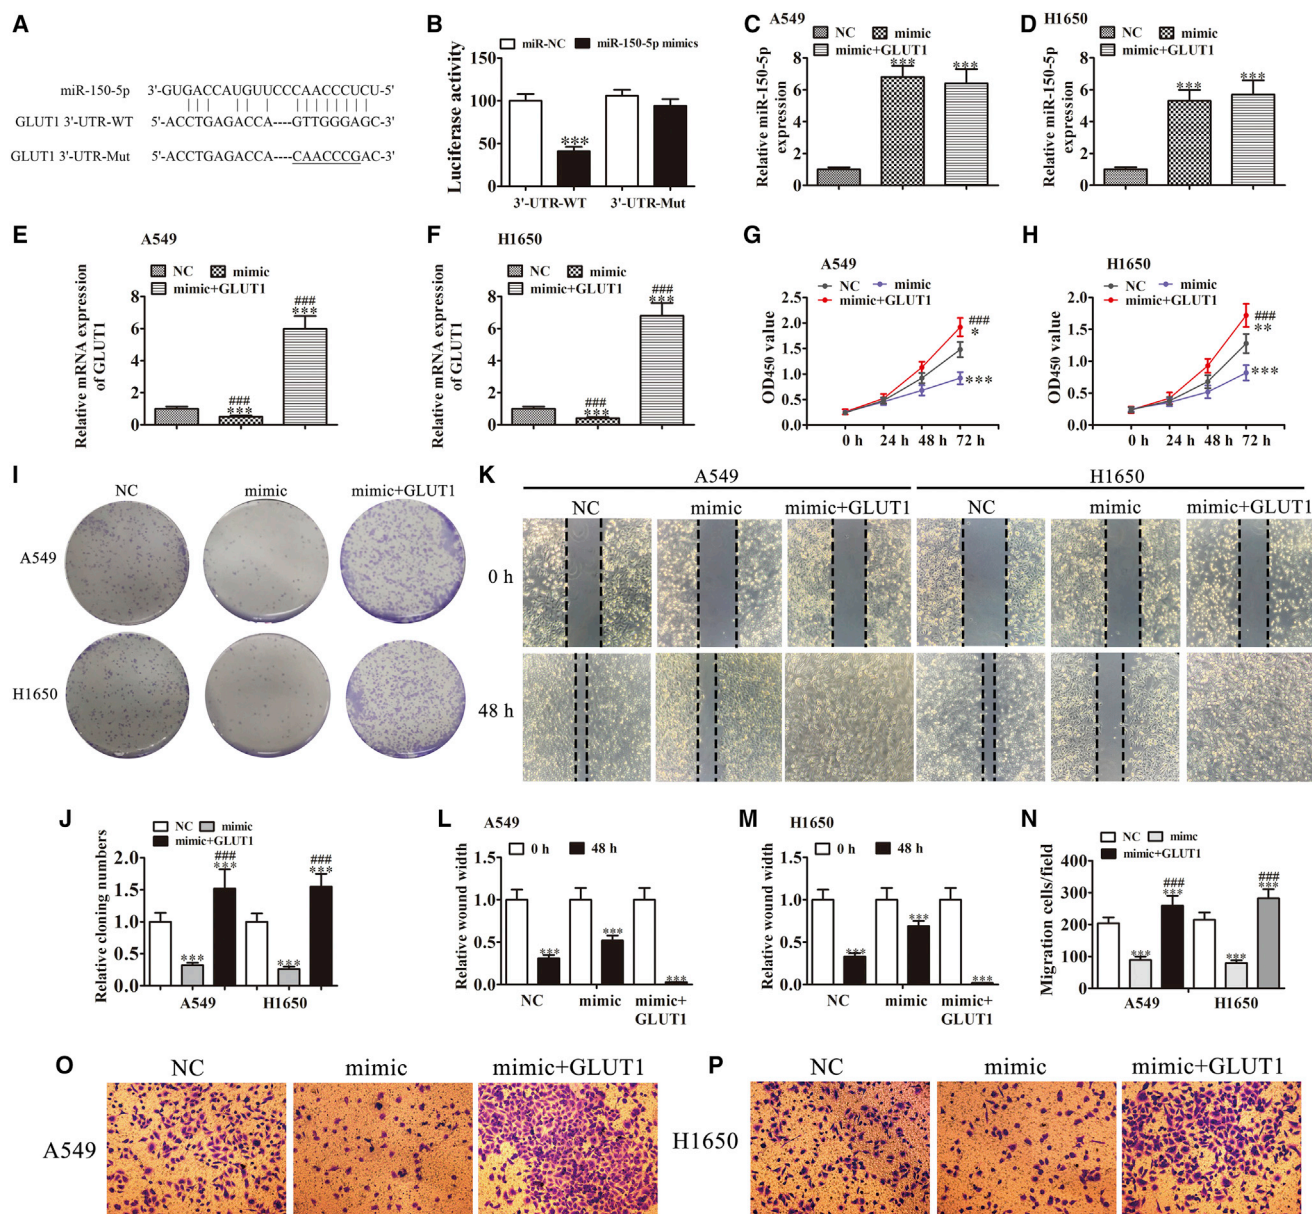

**Figure 6. GLUT1 Overexpression Reverses the Inhibitory Effect of miR-150-5p on Cellular Proliferation and Metastasis *In Vitro***

(A) The predicted binding sites of miR-150-5p with the 3' UTR of GLUT1. The mutated version of 3'-UTR-GLUT1 is also shown. (B) The relative luciferase activity was determined 48 h after transfection with miR-150-5p mimic/normal control or with the 3'-UTR-GLUT1 wild- or Mut-type in 293T cells. Data are presented as the mean  $\pm$  SD. \*\*\* $p$  < 0.001. (C and D) qRT-PCR detection showing the expression of miR-150-5p in both (C) A549 and (D) H1650 cells. (E and F) qRT-PCR detection showing the expression of GLUT1 in both A549 (E) and H1650 (F) cells. Data are presented as the mean  $\pm$  SD. \*\*\* $p$  < 0.001 versus NC. (G and H) CCK8 assay showing that GLUT1 overexpression rescued the proliferation of both (G) A549 and (H) H1650 cells after the upregulation of miR-150-5p. Data are presented as the mean  $\pm$  SD. \*\*\* $p$  < 0.001 versus NC. ### $p$  < 0.001 versus mimic. (I and J) Cloning formation assays showing that the overexpression of GLUT1 rescued the proliferation of both A549 and H1650 cells following the upregulation of miR-150-5p (I). The relative cloning numbers were calculated (J). Data are presented as the mean  $\pm$  SD. \*\*\* $p$  < 0.001 versus NC. ### $p$  < 0.001 versus mimic. (K–M) Wound-healing assays showing that the overexpression of GLUT1 rescued the invasion of both A549 (K and L) and H1650 (K and M) cells following the upregulation of miR-150-5p. Data are presented as the mean  $\pm$  SD. \*\*\* $p$  < 0.001 versus NC. ### $p$  < 0.001 versus mimic. (N–P) Transwell assay showing that GLUT1 overexpression rescued the migration of both A549 (N and O) and H1650 (N and P) cells following the upregulation of miR-150-5p. Data are presented as the mean  $\pm$  SD. \*\*\* $p$  < 0.001 versus NC. ### $p$  < 0.001 versus mimic.

reverse, 5'-GTAGCAGGGCTGGGATGAAAG-3'. The U6 primers were: forward, 5'-CTCGCTTCGGCAGCACA-3'; and reverse, 5'-AACGCTTACGAATTTGCGT-3'. The GAPDH primers were: forward, 5'-GCACCGTCAAGGCTGAGAAC-3'; and reverse, 5'-GGATCTCGCTCCTGGAAGATG-3'.

#### RNAi or Overexpression

The miR-150-5p inhibitors, miR-150-5p mimics, and siRNA against circARHGAP10 were purchased from GenePharma (Shanghai, China). The transfection was performed in accordance with the supplier's protocol. Briefly, the cells were transferred to six-well culture plates and transfected using Lipofectamine 2000 (Invitrogen, Carlsbad, CA, USA) as described earlier. To induce GLUT1 overexpression, a pCDNA3.0 vector was transfected as described earlier. For xenograft experiments, lentiviral-mediated circARHGAP10 silencing (sh-circARHGAP10) was induced in A549 cells.

#### Measurements of <sup>18</sup>F-FDG Uptake and Lactate Production

Sugar intake in this study was performed as described in our previous study.<sup>32</sup> Briefly, A549 or H1650 cells were transfected with or without sh-circARHGAP10 in 12-well plates. Approximately 48 h after transfection, the cells were collected and washed with PBS, and the collected cells were then incubated in 1 mL glucose-free DMEM containing <sup>18</sup>F-FDG (148 kBq [4 μCi/mL]) for 1 h at 37°C. A total of 1 mL 0.1 M NaOH was used to produce cell lysates. A well γ-counter was used to detect the level of lysate radioactivity. At the end of the experiments, the readouts were normalized to the corresponding amount of protein. Three independent experiments were performed during our study.

To measure the level of lactate production, the cells were transfected with the indicated plasmids in 12-well plates for 36 h. The cells were washed with PBS and cultured in serum-free DMEM for another 12 h. The cellular supernatants were collected to measure the level of lactate according to the instructions of the Lactate Assay Kit (Nanjing Jiancheng Bioengineering Institute, Nanjing, China). Data were normalized to the total protein, and three independent experiments were performed during our study.

#### Dual-Luciferase Reporter Assay

The miR-150-5p binding site containing a sequence of circARHGAP10 and the 3'-UTR-GLUT1, termed circARHGAP10-Wild-type, circARHGAP10-Mut, GLUT1-Wild-type, and GLUT1-Mut were inserted into the KpnI and HindIII sites of the pGL3 promoter vector (Realgene, Nanjing, China) in a dual-luciferase reporter assay. First, the cells were plated into 24-well plates. 80 ng plasmid, 5 ng Renilla luciferase vector pRL-SV40, 50 nM miR-150-5p mimics, and NC were transfected into cells by applying Lipofectamine 2000 (Invitrogen, Carlsbad, CA, USA). The cells were collected and measured following the manufacturer's instructions using the Dual-Luciferase Assay (Promega, Madison, WI, USA) after transfection for 48 h. All experiments were independently repeated three times.

#### Wound-Healing Assay

A549 or H1650 cells transfected with the corresponding vectors were seeded into six-well plates to form a single confluent cell layer. Wounds were generated with 100 μL tips in the confluent cell layer. At 0 h and 24 h after wound scratching, the width of the wound was photographed using a phase contrast microscope.

#### Cell Proliferation Assay

A Cell Counting Kit-8 (CCK8) assay was used to detect cellular proliferation. The transfected cells were seeded into 96-well plates at a density of 5,000 cells per well in triplicate wells. Cell viability was measured using the CCK8 system (GIBCO) at 0, 24, 48, 72, and 96 h after seeding, according to the manufacturer's instructions.

For the colony formation assay, transfected cells were seeded into six-well plates at a density of 2,000 cells per well and maintained in DMEM containing 10% FBS for 10 days. The colonies were imaged and counted after they were fixed and stained.

#### Transwell Migration Assay

Cell migration was analyzed using Transwell chambers (Corning, New York, NY, USA) in accordance with the manufacturer's protocol. After incubation for 24 h, the cells on the upper surfaces of the Transwell chambers were removed using cotton swabs, and the cells located on the lower surfaces were fixed with methanol for 10 min, followed by crystal violet staining. The stained cells were photographed and counted in five randomly selected fields.

#### Animal Studies

To examine the role of circARHGAP10 in a lung model of metastasis,  $1 \times 10^6$  stable lentiviral-mediated circARHGAP10-silenced sh-circRNA or sh-NC A549 cells were intravenously injected into male nude mice through the tail vein (Chinese Science Academy, Shanghai, China) for a month. After another month, lung metastasis was measured and quantified with *in vivo* bioluminescent imaging using the IVIS Lumina Series III (PerkinElmer, New York, NY, USA).

For xenograft assays,  $1 \times 10^6$  educated A549 or control cells were injected subcutaneously into the right side of each male nude mouse (Chinese Science Academy). The size of the tumors (length  $\times$  width<sup>2</sup>  $\times$  0.5) were measured at the indicated time points, and tumors were obtained 4 weeks after injection.

#### Immunohistochemistry and Immunofluorescence

Tumor tissue samples were fixed in a 10% formalin solution and embedded in paraffin. Sections (5 μm thick) were stained with Ki67 and GLUT1 to evaluate proliferation and GLUT1 expression. Sections were examined using an Axiophot light microscope (Zeiss, Oberkochen, Germany) or Olympus FluoView FV1000 confocal microscope (Olympus, London, England) and photographed with a digital camera.

#### Statistical Analysis

The differences between two groups were assessed using paired or unpaired t tests (two-tailed). A Pearson's correlation test was used to

determine the association between two groups. Results were presented as the mean  $\pm$  SEM. The  $p$  values  $< 0.05$  were considered significant. Statistical analyses were performed using GraphPad Prism 5.02 software (GraphPad, San Diego, CA, USA).

### Ethics Approval and Consent to Participate

The present study was approved by the Renji Hospital at Shanghai Jiaotong University Committee.

### SUPPLEMENTAL INFORMATION

Supplemental Information can be found online at <https://doi.org/10.1016/j.omtn.2019.08.016>.

### AUTHOR CONTRIBUTIONS

G.H. and J.L. conducted the study design. M.J. carried out the assays and collected the samples. C.Y. performed the statistical analysis. C.S. participated in the coordination of research and worked as a technical consultant. M.J. drafted the manuscript. All authors reviewed and approved the final manuscript.

### CONFLICT OF INTERESTS

The authors declare no competing interests.

### ACKNOWLEDGMENTS

The study was supported by research grants from The National Natural Science Foundation of China (81830052 and 81530053) and the Shanghai Key Laboratory of Molecular Imaging (18DZ2260400). All data of this article have been uploaded. The present study was approved by the Renji Hospital at Shanghai Jiaotong University Committee. All authors have agreed to publish the final manuscript.

### REFERENCES

- Miller, K.D., Goding Sauer, A., Ortiz, A.P., Fedewa, S.A., Pinheiro, P.S., Tortolero-Luna, G., Martinez-Tyson, D., Jemal, A., and Siegel, R.L. (2018). Cancer statistics for Hispanics/Latinos, 2018. *CA Cancer J. Clin.* **68**, 425–445.
- Tan, C.S., Gilligan, D., and Pacey, S. (2015). Treatment approaches for EGFR-inhibitor-resistant patients with non-small-cell lung cancer. *Lancet Oncol.* **16**, e447–e459.
- Gridelli, C., Rossi, A., Carbone, D.P., Guarize, J., Karachaliou, N., Mok, T., Petrella, F., Spaggiari, L., and Rosell, R. (2015). Non-small-cell lung cancer. *Nat. Rev. Dis. Primers* **1**, 15009.
- Nigro, J.M., Cho, K.R., Fearon, E.R., Kern, S.E., Ruppert, J.M., Oliner, J.D., Kinzler, K.W., and Vogelstein, B. (1991). Scrambled exons. *Cell* **64**, 607–613.
- Capel, B., Swain, A., Nocolis, S., Hacker, A., Walter, M., Koopman, P., Goodfellow, P., and Lovell-Badge, R. (1993). Circular transcripts of the testis-determining gene *Sry* in adult mouse testis. *Cell* **73**, 1019–1030.
- Rybak-Wolf, A., Stottmeister, C., Gařar, P., Jens, M., Pino, N., Giusti, S., Hanan, M., Behm, M., Bartok, O., Ashwal-Fluss, R., et al. (2015). Circular RNAs in the mammalian brain are highly abundant, conserved, and dynamically expressed. *Mol. Cell* **58**, 870–885.
- Hansen, T.B., Jensen, T.I., Clausen, B.H., Bramsen, J.B., Finsen, B., Damgaard, C.K., and Kjems, J. (2013). Natural RNA circles function as efficient microRNA sponges. *Nature* **495**, 384–388.
- Salzman, J., Gawad, C., Wang, P.L., Lacayo, N., and Brown, P.O. (2012). Circular RNAs are the predominant transcript isoform from hundreds of human genes in diverse cell types. *PLoS ONE* **7**, e30733.
- Du, W.W., Yang, W., Liu, E., Yang, Z., Dhaliwal, P., and Yang, B.B. (2016). Foxo3 circular RNA retards cell cycle progression via forming ternary complexes with p21 and CDK2. *Nucleic Acids Res.* **44**, 2846–2858.
- Memczak, S., Jens, M., Elefsinioti, A., Torti, F., Krueger, J., Rybak, A., Maier, L., Mackowiak, S.D., Gregersen, L.H., Munschauer, M., et al. (2013). Circular RNAs are a large class of animal RNAs with regulatory potency. *Nature* **495**, 333–338.
- Tian, X., Zhang, L., Jiao, Y., Chen, J., Shan, Y., and Yang, W. (2019). CircABC10 promotes non-small cell lung cancer cell proliferation and migration by regulating the miR-1252/FOXR2 axis. *J. Cell. Biochem.* **120**, 3765–3772.
- Tan, S., Sun, D., Pu, W., Gou, Q., Guo, C., Gong, Y., Li, J., Wei, Y.Q., Liu, L., Zhao, Y., and Peng, Y. (2018). Circular RNA F-circEA-2a derived from EML4-ALK fusion gene promotes cell migration and invasion in non-small cell lung cancer. *Mol. Cancer* **17**, 138.
- Vander Heiden, M.G., Cantley, L.C., and Thompson, C.B. (2009). Understanding the Warburg effect: the metabolic requirements of cell proliferation. *Science* **324**, 1029–1033.
- Gonzalez-Menendez, P., Hevia, D., Alonso-Arias, R., Alvarez-Artme, A., Rodriguez-Garcia, A., Kinet, S., Gonzalez-Pola, I., Taylor, N., Mayo, J.C., and Sainz, R.M. (2018). GLUT1 protects prostate cancer cells from glucose deprivation-induced oxidative stress. *Redox Biol.* **17**, 112–127.
- Li, Z., Huang, J., Shen, S., Ding, Z., Luo, Q., Chen, Z., and Lu, S. (2018). SIRT6 drives epithelial-to-mesenchymal transition and metastasis in non-small cell lung cancer via snail-dependent transrepression of KLF4. *J. Exp. Clin. Cancer Res.* **37**, 323.
- Kandathil, A., Kay, F.U., Butt, Y.M., Wachsmann, J.W., and Subramaniam, R.M. (2018). Role of FDG PET/CT in the eighth edition of TNM staging of non-small cell lung cancer. *Radiographics* **38**, 2134–2149.
- Goodwin, J., Neugent, M.L., Lee, S.Y., Choe, J.H., Choi, H., Jenkins, D.M.R., Ruthenborg, R.J., Robinson, M.W., Jeong, J.Y., Wake, M., et al. (2017). The distinct metabolic phenotype of lung squamous cell carcinoma defines selective vulnerability to glycolytic inhibition. *Nat. Commun.* **8**, 15503.
- Wang, R., Zhang, S., Chen, X., Li, N., Li, J., Jia, R., Pan, Y., and Liang, H. (2018). EIF4A3-induced circular RNA MMP9 (circMMP9) acts as a sponge of miR-124 and promotes glioblastoma multiforme cell tumorigenesis. *Mol. Cancer* **17**, 166.
- Liu, H., Bi, J., Dong, W., Yang, M., Shi, J., Jiang, N., Lin, T., and Huang, J. (2018). Invasion-related circular RNA circFND3B inhibits bladder cancer progression through the miR-1178-3p/G3BP2/SRC/FAK axis. *Mol. Cancer* **17**, 161.
- Wang, L., Tong, X., Zhou, Z., Wang, S., Lei, Z., Zhang, T., Liu, Z., Zeng, Y., Li, C., Zhao, J., et al. (2018). Circular RNA hsa\_circ\_0008305 (circPTK2) inhibits TGF- $\beta$ -induced epithelial-mesenchymal transition and metastasis by controlling TIF1 $\gamma$  in non-small cell lung cancer. *Mol. Cancer* **17**, 140.
- Kaira, K., Shimizu, K., Kitahara, S., Yajima, T., Atsumi, J., Kosaka, T., Ohtaki, Y., Higuchi, T., Oyama, T., Asao, T., and Mogi, A. (2018). 2-Deoxy-2-[fluorine-18] fluoro-d-glucose uptake on positron emission tomography is associated with programmed death ligand-1 expression in patients with pulmonary adenocarcinoma. *Eur. J. Cancer* **101**, 181–190.
- Wei, R., Mao, L., Xu, P., Zheng, X., Hackman, R.M., Mackenzie, G.G., and Wang, Y. (2018). Suppressing glucose metabolism with epigallocatechin-3-gallate (EGCG) reduces breast cancer cell growth in preclinical models. *Food Funct.* **9**, 5682–5696.
- Ma, Y., Wang, W., Idowu, M.O., Oh, U., Wang, X.Y., Temkin, S.M., and Fang, X. (2018). Ovarian cancer relies on glucose transporter 1 to fuel glycolysis and growth: anti-tumor activity of BAY-876. *Cancers (Basel)* **11**, E33.
- Liu, Y.X., Feng, J.Y., Sun, M.M., Liu, B.W., Yang, G., Bu, Y.N., Zhao, M., Wang, T.J., Zhang, W.Y., Yuan, H.F., and Zhang, X.D. (2019). Aspirin inhibits the proliferation of hepatoma cells through controlling GLUT1-mediated glucose metabolism. *Acta Pharmacol. Sin.* **40**, 122–132.
- Wang, M., Wang, W., Wang, J., and Zhang, J. (2018). MiR-182 promotes glucose metabolism by upregulating hypoxia-inducible factor 1 $\alpha$  in NSCLC cells. *Biochem. Biophys. Res. Commun.* **504**, 400–405.
- Chen, X., Xu, X., Pan, B., Zeng, K., Xu, M., Liu, X., He, B., Pan, Y., Sun, H., and Wang, S. (2018). miR-150-5p suppresses tumor progression by targeting VEGFA in colorectal cancer. *Aging (Albany N.Y.)* **10**, 3421–3437.

27. Yan, R., Yang, T., Zhai, H., Zhou, Z., Gao, L., and Li, Y. (2018). MicroRNA-150-5p affects cell proliferation, apoptosis, and EMT by regulation of the BRAF<sup>V600E</sup> mutation in papillary thyroid cancer cells. *J. Cell. Biochem.* *119*, 8763–8772.
28. Yu, J., Feng, Y., Wang, Y., and An, R. (2018). Aryl hydrocarbon receptor enhances the expression of miR-150-5p to suppress in prostate cancer progression by regulating MAP3K12. *Arch. Biochem. Biophys.* *654*, 47–54.
29. Koshizuka, K., Hanazawa, T., Kikkawa, N., Katada, K., Okato, A., Arai, T., Idichi, T., Osako, Y., Okamoto, Y., and Seki, N. (2018). Antitumor miR-150-5p and miR-150-3p inhibit cancer cell aggressiveness by targeting SPOCK1 in head and neck squamous cell carcinoma. *Auris Nasus Larynx* *45*, 854–865.
30. Xie, F., Li, Y., Wang, M., Huang, C., Tao, D., Zheng, F., Zhang, H., Zeng, F., Xiao, X., and Jiang, G. (2018). Circular RNA BCRC-3 suppresses bladder cancer proliferation through miR-182-5p/p27 axis. *Mol. Cancer* *17*, 144.
31. Li, S., Gu, H., Huang, Y., Peng, Q., Zhou, R., Yi, P., Chen, R., Huang, Z., Hu, X., Huang, Y., and Tang, D. (2018). Circular RNA 101368/miR-200a axis modulates the migration of hepatocellular carcinoma through HMGB1/RAGE signaling. *Cell Cycle* *17*, 2349–2359.
32. An, S., Huang, L., Miao, P., Shi, L., Shen, M., Zhao, X., Liu, J., and Huang, G. (2018). Small ubiquitin-like modifier 1 modification of pyruvate kinase M2 promotes aerobic glycolysis and cell proliferation in A549 human lung cancer cells. *OncoTargets Ther.* *11*, 2097–2109.

OMTN, Volume 18

## **Supplemental Information**

**Upregulated circRNA ARHGAP10 Predicts  
an Unfavorable Prognosis in NSCLC through  
Regulation of the miR-150-5p/GLUT-1 Axis**

**Mingming Jin, Chunzi Shi, Chen Yang, Jianjun Liu, and Gang Huang**

## Supplementary materials 1

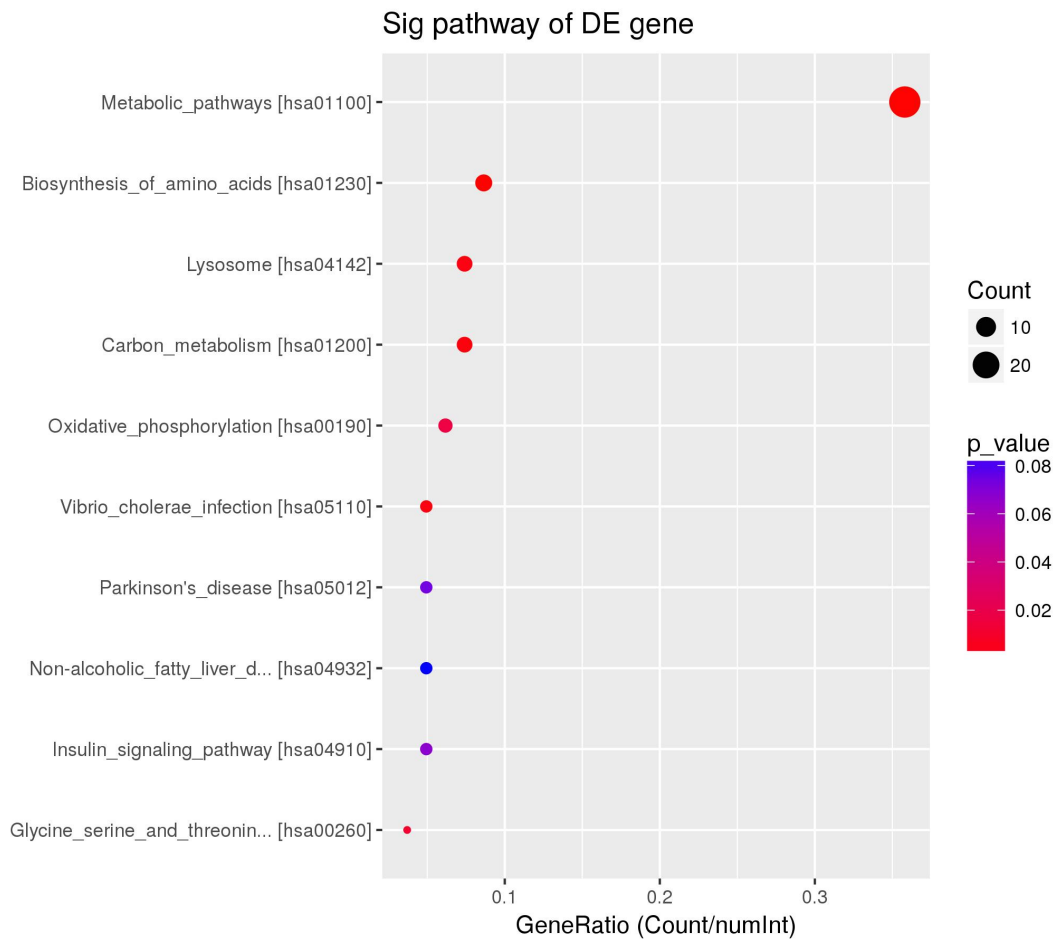

Figure legend: Metabolic pathway analysis.

Supplementary materials 2

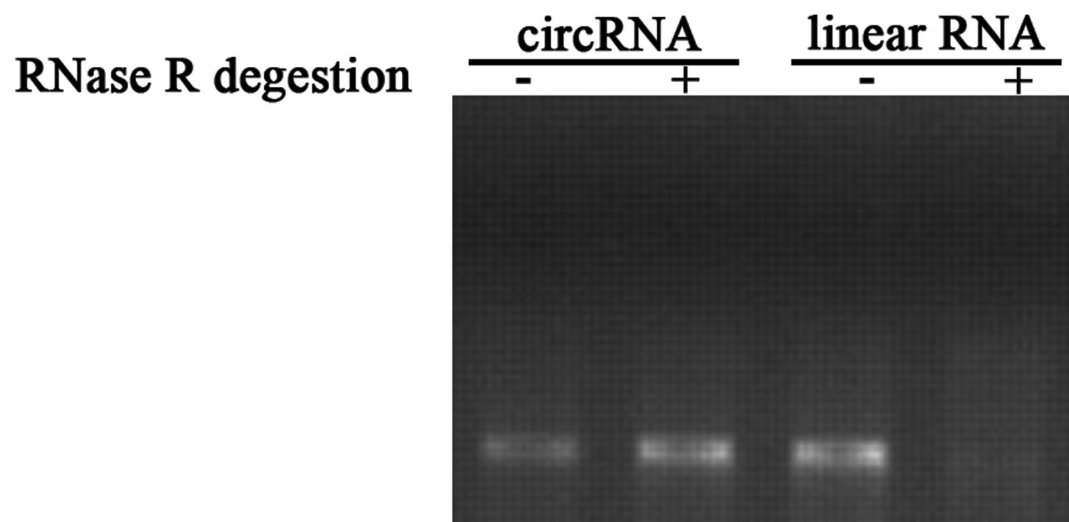

Figure legend: Agarose gel electrophoresis detection show the target segment of circARHGAP10 or linear RNA treatment with or without RNase R.
